# Supplementary material
Source: PubMed Central journal article supplement (PMC3480180)
Supplement: NIHMS410283-supplement-Supplementary_material.pdf [file NIHMS410283-supplement-Supplementary_material.pdf]

## Supplementary Information

for

### RNA-PAIRS: RNA Probabilistic Assignment of Imino Resonance Shifts

Arash Bahrami<sup>a</sup>, Lawrence J. Clos II<sup>a</sup>, John L. Markley<sup>a,b</sup>, Samuel E. Butcher<sup>a,b</sup>,  
and Hamid R. Eghbalnia<sup>c,1</sup>

<sup>a</sup>National Magnetic Resonance Facility at Madison, <sup>b</sup>Biochemistry Department, University of Wisconsin-Madison, Madison, WI 53706, <sup>c</sup>Department of Molecular and Cellular Physiology, University of Cincinnati, Cincinnati, OH 45267

Author contributions: H.R.E, S.E.B, L.J.C., A.B., and J.L.M designed the research. L.J.C. and A.B contributed equally to various aspects of the algorithm development. A.B. implemented the software; L.J.C. collected, assigned, and simulated NMR data sets. L.J.C. and A.B. tested and validated PARS results. All authors contributed to the writing of the paper.

The authors declare no conflict of interest.

<sup>1</sup>To whom correspondence may be addressed: E-mail: [eghbalhd@uc.edu](mailto:eghbalhd@uc.edu).

**Visual Presentation of Assignment and Base Pairing Results.** The imino assignment and base pairing results for the RNA molecules with “direct” experimental data is visually coded in Figure S1.

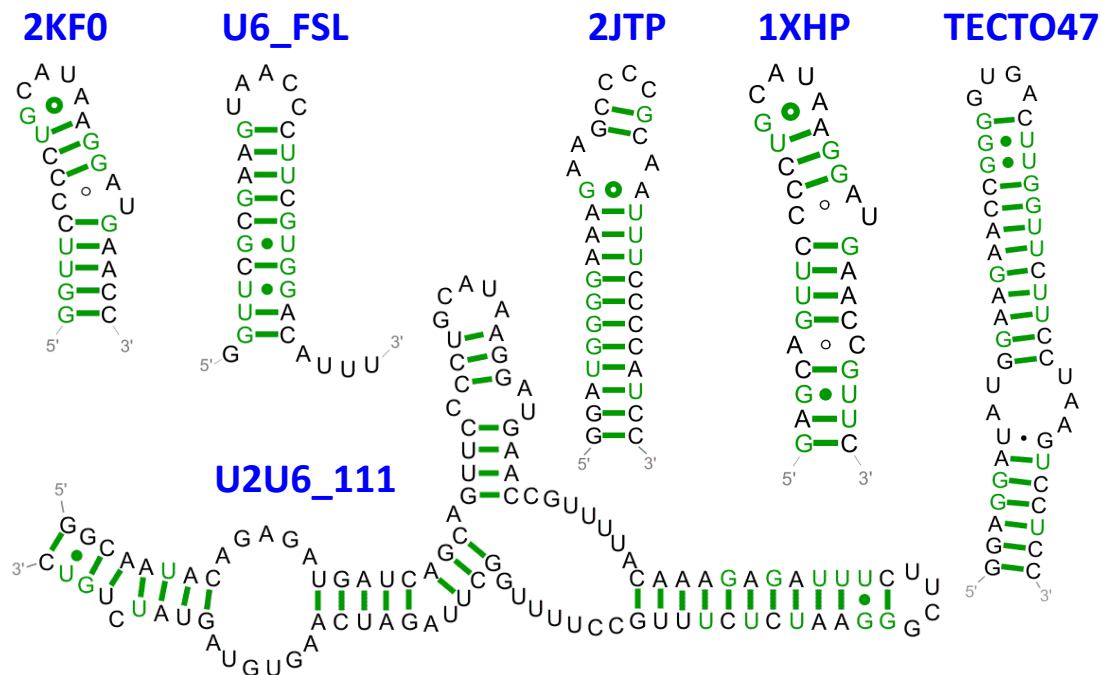

**Fig S1.** Green residue letters in the figure specify correct imino proton assignment within the best 3 choices. Green base-pair connectors (dashes for Watson-Crick, or circles for mismatch pairs) specify correct best choice base pair prediction.

## Formal outline of the Algorithm (Figure 2 main text)

Inputs: NMR Experiments<sup>1</sup>, Sequence

Optional Inputs: User-defined base pairing

P: Probability of states of the network signifying assignment/secondary structure

$P_{\text{new}}/P_{\text{previous}}$  are respectively the current probabilities and previous probabilities

### ***Begin RNA-PAIRS***

#### ***Begin Process Input***

Predict secondary structure ensemble

Align peaks and cluster

Perform NOESY cluster analysis

Load resonance distributions derived from BMRB

#### ***End Process Input***

$P_{\text{previous}} = F(\text{initial energy})^2$

$P_{\text{new}} = 0;$

Begin Loop While ( $P_{\text{new}} \neq P_{\text{previous}}$ )<sup>3</sup>

Update  $P_{\text{new}}$

End Loop

### ***End***

1 Currently supported experiments: 1H-1H 2D NOESY, 1H-15N 2D HMQC

2  $F(\text{initial energy})$  is calculated according to formula 2.

3 ( $P_{\text{new}} = P_{\text{previous}}$ ) if probabilities have not changed more than a small value

4 Update  $P_{\text{new}}$  is performed according to equation 2 (or 3 as appropriate)

Secondary structure ensemble is based on equation 1 in the main text

Equations 2 and 3 are restated below (from the main text).

$$E_S = \sum_i U_i(\lambda(v_i)) + \sum_{i,j} U_{ij}(\lambda(v_i), \lambda(v_j)) \quad (2)$$

$$E_S = \sum_i U_i(\gamma(\rho_i)) + \sum_{i,j} U_{ij}(\gamma(\rho_i), \gamma(\rho_j)) + \sum_{i,j,k} U_{ijk}(\gamma(\rho_i), \gamma(\rho_j), \gamma(\rho_k)) \quad (3)$$
